# Supplementary material for: Investigation of a Fe–N–C catalyst for sulfur dioxide electrooxidation
Source: Royal Society of Chemistry journal article supplement (doi:10.1039/c6ra16872h), 2016-01-01
Supplement: c6ra16872h1.pdf [file c6ra16872h1.pdf]

**Table S1. The deconvolution spectrum data of XPS**

| sam<br>ple<br>s | C            |               |                      | O                |              | N                |              |              | Fe                   |              |               |                      |      |
|-----------------|--------------|---------------|----------------------|------------------|--------------|------------------|--------------|--------------|----------------------|--------------|---------------|----------------------|------|
|                 | Atom<br>ic/% | B. E. /<br>eV | Perc<br>enta<br>ge/% | Ato<br>mic<br>/% | B. E.<br>/eV | Perce<br>ntage/% | Atom<br>ic/% | B. E.<br>/eV | Perce<br>ntage<br>/% | Atom<br>ic/% | B. E. /<br>eV | Perc<br>enta<br>ge/% |      |
| BP20<br>00      | 98.1         | 284.4         | 58.0                 | 1.9              | 531.7        | 52.1             | 0            |              |                      | 0            |               |                      |      |
|                 |              | 285.2         | 17.7                 |                  | 532.5        | 22.9             |              |              |                      |              |               |                      |      |
|                 |              | 289.5         | 24.3                 |                  | 533.4        | 25.0             |              |              |                      |              |               |                      |      |
| Fe-<br>N-C      | 89.4         | 284.3         | 37.3                 | 6.3              | 530.4        | 31.6             | 3.2          | 398.2        | 27.7                 | 1.0          | 710.7         | 21.9                 |      |
|                 |              | 284.7         | 32.0                 |                  |              | 398.9            |              | 21.3         | 711.3                |              | 27.9          |                      |      |
|                 |              | 285.8         | 17.0                 |                  |              | 399.5            |              | 15.4         | 712.5                |              | 23.2          |                      |      |
|                 |              | 289.3         | 13.8                 |                  |              | 531.7            |              | 49.1         | 400.3                |              | 17.6          | 718.6                | 1.1  |
|                 |              |               |                      |                  |              | 532.8            |              | 19.4         | 401.1                |              | 14.7          | 724.6                | 25.9 |
|                 |              |               |                      |                  |              |                  |              |              | 403.1                |              | 3.3           |                      |      |
